# Supplementary material for: Social determinants and lifestyle factors for brain health: implications for risk reduction of cognitive decline and dementia
Source: PubMed Central journal article supplement (PMC9334303; doi:10.1038/s41598-022-16771-6), 2022-07-28
Supplement: 41598_2022_16771_MOESM1_ESM.pdf [file 41598_2022_16771_MOESM1_ESM.pdf]

**Table S1. Operationalization of the Lifestyle for Brain Health (LIBRA) score and factor weights in the Leipzig Research Centre for Civilization Diseases Adult Study (LIFE).**

| <b>Factor</b>        | <b>Assessment</b>                                                                                                                                                                                                                                                                                                                                                                                                 | <b>Operationalization and cutoffs</b>                                                                                                                                                                                                                                                                             | <b>N (missings)</b> | <b>Weight</b> |
|----------------------|-------------------------------------------------------------------------------------------------------------------------------------------------------------------------------------------------------------------------------------------------------------------------------------------------------------------------------------------------------------------------------------------------------------------|-------------------------------------------------------------------------------------------------------------------------------------------------------------------------------------------------------------------------------------------------------------------------------------------------------------------|---------------------|---------------|
| Heart disease        | Self-reported medical history                                                                                                                                                                                                                                                                                                                                                                                     | Any of: myocardial infarction, angina pectoris, arrhythmia, cardiac insufficiency                                                                                                                                                                                                                                 | 9786 (214)          | +1.0          |
| Diabetes mellitus    | Oral glucose tolerance test (oGTT) was conducted in all fasted participants who came to the study centre before 8 a.m. After initial blood drawing and an intake of 75 g of glucose solution (Accu-Chek® Dextrose O.G.T. Saft, Roche Diagnostics Deutschland GmbH), blood samples were taken for measurement of glucose and insulin concentration at 30 (glucose only) and 120 min; self-reported medical history | According to established cutoffs of the World Health Organization (WHO) guidelines <sup>1</sup> : hemoglobin A1c (HbA1c) $\geq$ 6.5% ( $\geq$ 48 mmol/mol); if HbA1c was not available: fasting glucose $\geq$ 7.0 mmol/l; oral glucose tolerance test (oGTT; 120 min) $\geq$ 11.0 mmol/l; self-reported diabetes | 10000 (0)           | +1.3          |
| Hypercholesterolemia | Laboratory test performed on fresh biospecimen directly on the day of sample collection; including total cholesterol, high-density lipoprotein (HDL), low-density lipoprotein (LDL) cholesterol                                                                                                                                                                                                                   | According to the guidelines of the German Cardiac Society <sup>2</sup> : raw value of total cholesterol of $\geq$ 5.2 mmol/l and low-density lipoprotein (LDL) of $\geq$ 4.2 mmol/l                                                                                                                               | 9772 (228)          | +1.4          |
| Hypertension         | Blood pressure was measured three times at 3-min intervals using an automatic oscillometric blood pressure monitor (OMRON 705IT, OMRON Medizintechnik Handelsgesellschaft mbH) after resting for at least 5 min at the study center; self-reported medical history                                                                                                                                                | According to WHO guidelines <sup>3</sup> : mean systolic blood pressure $\geq$ 140 mm Hg; or, if not available, diastolic blood pressure $\geq$ 90 mm Hg, or self-reported hypertension                                                                                                                           | 9987 (13)           | +1.6          |
| Depression           | 20-item version of the Centre of Epidemiological Studies Depression Scale (CES-D) <sup>4</sup> ; self-reported medical history                                                                                                                                                                                                                                                                                    | CES-D score $\geq$ 16 or, if not available, self-reported depression                                                                                                                                                                                                                                              | 9431 (569)          | +2.1          |
| Obesity              | Body mass index (BMI) based on weight and height measurement. Body weight was measured with an electronic scale (SECA 701, Seca GmbH & Co KG) with a precision of 0.01 kg. Body height was assessed by means of a stadiometer (SECA 240) to the nearest 0.1 cm                                                                                                                                                    | Established cut-offs according to WHO guidelines <sup>5</sup> : BI) $\geq$ 30; if BMI was not available: waist circumference for women > 88 cm, for men > 102 cm                                                                                                                                                  | 9980 (20)           | +1.6          |

|                                     |                                                                                                                                                                                                                                                                                                                                                                                                                                                                                                                                                                                                                                                                                                                                                                                                                          |                                                                                                                                                                                                                                                                                                                   |             |      |
|-------------------------------------|--------------------------------------------------------------------------------------------------------------------------------------------------------------------------------------------------------------------------------------------------------------------------------------------------------------------------------------------------------------------------------------------------------------------------------------------------------------------------------------------------------------------------------------------------------------------------------------------------------------------------------------------------------------------------------------------------------------------------------------------------------------------------------------------------------------------------|-------------------------------------------------------------------------------------------------------------------------------------------------------------------------------------------------------------------------------------------------------------------------------------------------------------------|-------------|------|
|                                     | Waist circumferences; taken using an ergonomic circumference measuring tape (SECA 201) to the nearest 0.1 cm                                                                                                                                                                                                                                                                                                                                                                                                                                                                                                                                                                                                                                                                                                             |                                                                                                                                                                                                                                                                                                                   |             |      |
| Smoking                             | Standardized self-report questionnaire on ever and current smoking.                                                                                                                                                                                                                                                                                                                                                                                                                                                                                                                                                                                                                                                                                                                                                      | Self-reported current smoker                                                                                                                                                                                                                                                                                      | 9590 (410)  | +1.5 |
| Low-to-moderate alcohol consumption | Standardized self-report questionnaire on frequency and amount of different alcoholic beverages consumed within the last year                                                                                                                                                                                                                                                                                                                                                                                                                                                                                                                                                                                                                                                                                            | Estimate of consumed grams of alcohol per day; low-to-moderate drinking as any amount of up to 12g/day for women, 24g/day for men according to German guidelines <sup>6</sup>                                                                                                                                     | 9756 (244)  | -1.0 |
| Physical inactivity                 | Subjectively reported physical activity was assessed using the short form of the International Physical Activity Questionnaire (IPAQ-SF) <sup>7</sup>                                                                                                                                                                                                                                                                                                                                                                                                                                                                                                                                                                                                                                                                    | Total metabolic equivalent of task (MET) according to IPAQ-SF; "low" [= physically inactive], i.e. less than moderate level nominally indicating meeting physical activity guidelines of 30 minutes of moderate intensity activity 5 days a week, 20 minutes of vigorous activity 3 days a week, or a combination | 8270 (1730) | +1.1 |
| High cognitive activity             | Indices of occupational cognitive demands were based on data from the 2010 Standard Occupational Classification of the O*NET database ( <a href="http://www.onetonline.org">http://www.onetonline.org</a> ) <sup>8</sup> by the US Department of Labor/Employment and Training Administration (USDOL/ETA). O*NET contains standardized validated descriptors for a wide range of occupations, including associated level and importance of cognitive abilities. We first translated the main occupation of each LIFE-Adult Study participants into English, and then matched the corresponding O*NET code to the occupation. O*NET data on cognitive abilities comprised 7 descriptors (e.g., memorization, deductive reasoning, verbal abilities) with a rating of the degree of its importance (1 = not important, 5 = | High cognitive activity being assumed for those in the highest tertile                                                                                                                                                                                                                                            | 7900 (2100) | -3.2 |

|                        |                                                                                                                                                                                                                                                                                                                                                              |                                                                                                                                                                                                                                                                                                                   |            |      |
|------------------------|--------------------------------------------------------------------------------------------------------------------------------------------------------------------------------------------------------------------------------------------------------------------------------------------------------------------------------------------------------------|-------------------------------------------------------------------------------------------------------------------------------------------------------------------------------------------------------------------------------------------------------------------------------------------------------------------|------------|------|
|                        | extremely important) and the level of how much a descriptor is needed to perform an occupation (0 = not at all, 7 = very much). The average of descriptors for importance and level was calculated, and both factors were calculate to achieve a continuous variable of overall occupational cognitive demand. The score was then split into tertiles.Thanks |                                                                                                                                                                                                                                                                                                                   |            |      |
| Healthy diet           | Regarding dietary patterns, participants were asked about the consumption frequency of 34 food groups and 13 types of beverages within the last 12 months                                                                                                                                                                                                    | Self-report of intake of several portions of fruit and/or vegetable daily over the last 12 months as assessed using a food frequency questionnaire                                                                                                                                                                | 9779 (221) | -1.7 |
| Chronic kidney disease | Laboratory test performed on fresh biospecimen directly on the day of sample collection; serum creatinine blood test;<br>self-reported medical history                                                                                                                                                                                                       | Estimated glomerular filtration rate (eGFR) calculated using the cystatin C-based chronic kidney disease (CKD) epidemiology collaboration equation <sup>9</sup> , eGFR cutoff < 60 mL/min/1.73m <sup>2</sup> ; or, if not available, self-report of kidney insufficiency, any other kidney disease, dialysis duty | 9401 (599) | +1.1 |

## References

1. World Health Organization. *Classification of diabetes mellitus*. Geneva: World Health Organization; 2019. <https://apps.who.int/iris/handle/10665/325182>.
2. Leitlinien der Deutschen Gesellschaft für Kardiologie – Herz- und Kreislaufforschung e.V. <https://leitlinien.dgk.org/>. Updated January 14, 2022. Accessed January 14, 2022.
3. 1999 World Health Organization-International Society of Hypertension Guidelines for the Management of Hypertension. Guidelines Subcommittee. *J Hypertens*. 1999;17(2):151-183.
4. Radloff LS. The CES-D Scale. *Applied Psychological Measurement*. 1977;1(3):385-401. doi:10.1177/014662167700100306.
5. World Health Organization. *Waist circumference and waist-hip ratio : report of a WHO expert consultation, Geneva, 8-11 December 2008*. Geneva: World Health Organization. 2011. <https://apps.who.int/iris/handle/10665/44583>.
6. Basisinfo\_Alkohol. [https://www.dhs.de/fileadmin/user\\_upload/pdf/Broschueren/Basisinfo\\_Alkohol.pdf](https://www.dhs.de/fileadmin/user_upload/pdf/Broschueren/Basisinfo_Alkohol.pdf). Accessed January 14, 2022.

7. Hagströmer M, Oja P, Sjöström M. The International Physical Activity Questionnaire (IPAQ): a study of concurrent and construct validity. *Public Health Nutr.* 2006;9(6):755-762. doi:10.1079/phn2005898.
8. Handel MJ. The O\*NET content model: strengths and limitations. *Journal for Labour Market Research.* 2016;49(2):157-176. doi:10.1007/s12651-016-0199-8.
9. Inker LA, Schmid CH, Tighiouart H, et al. Estimating Glomerular Filtration Rate from Serum Creatinine and Cystatin C. *New England Journal of Medicine.* 2012;367(1):20-29. doi:10.1056/NEJMoa1114248.
